# Supplementary material for: Carbonization of MOF-5/Polyaniline Composites to N,O-Doped Carbon/ZnO/ZnS and N,O-Doped Carbon/ZnO Composites with High Specific Capacitance, Specific Surface Area and Electrical Conductivity
Source: MDPI journal article supplement (doi:10.3390/ma16031018), 2023-01-22
Supplement: s1 [file s1]

Supplementary materials

# Carbonization of MOF-5/Polyaniline Composites to N,O-Doped Carbon/ZnO/ZnS and N,O-Doped Carbon/ZnO Composites with High Specific Capacitance, Specific Surface Area and Electrical Conductivity

Marjetka Savić<sup>1</sup>, Aleksandra Janošević Ležaić<sup>2</sup>, Nemanja Gavrilov<sup>3</sup>, Igor Pašti<sup>3</sup>, Bojana Nedić Vasiljević<sup>3</sup>, Jugoslav Krstić<sup>4</sup> and Gordana Ćirić-Marjanović<sup>3,\*</sup>

<sup>1</sup> Vinča Institute of Nuclear Science, University of Belgrade, National Institute of the Republic of Serbia, P.O. Box 522, 11001 Belgrade, Serbia

<sup>2</sup> Faculty of Pharmacy, University of Belgrade, Vojvode Stepe 450, P.O. Box 146, 11221 Belgrade, Serbia

<sup>3</sup> Faculty of Physical Chemistry, University of Belgrade, Studentski trg 12-16, 11158 Belgrade, Serbia

<sup>4</sup> Department of Catalysis and Chemical Engineering, Institute of Chemistry, Technology and Metallurgy, University of Belgrade, Njegoševa 12, 11000 Belgrade, Serbia

\* Correspondence: gordana@ffh.bg.ac.rs

**Citation:** Savić, M.; Janošević Ležaić, A.; Gavrilov, N.; Pašti, I.; Nedić Vasiljević, B.; Krstić, J.; Ćirić-Marjanović, G. Carbonization of MOF-5/Polyaniline Composites to N,O-Doped Carbon/ZnO/ZnS and N,O-Doped Carbon/ZnO Composites with High Specific Capacitance, Specific Surface Area and Electrical Conductivity. *Materials* **2023**, *16*, 1018. <https://doi.org/10.3390/ma16031018>

Academic Editor: Anastasios J. Tasiopoulos

Received: 19 December 2022

Revised: 12 January 2023

Accepted: 18 January 2023

Published: 9 February 2023

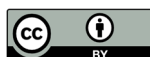

**Copyright:** © 2023 by the authors. Licensee MDPI, Basel, Switzerland. This article is an open access article distributed under the terms and conditions of the Creative Commons Attribution (CC BY) license (<https://creativecommons.org/licenses/by/4.0/>).

## S1. EDX spectra of C-(MOF-5/PANI) samples

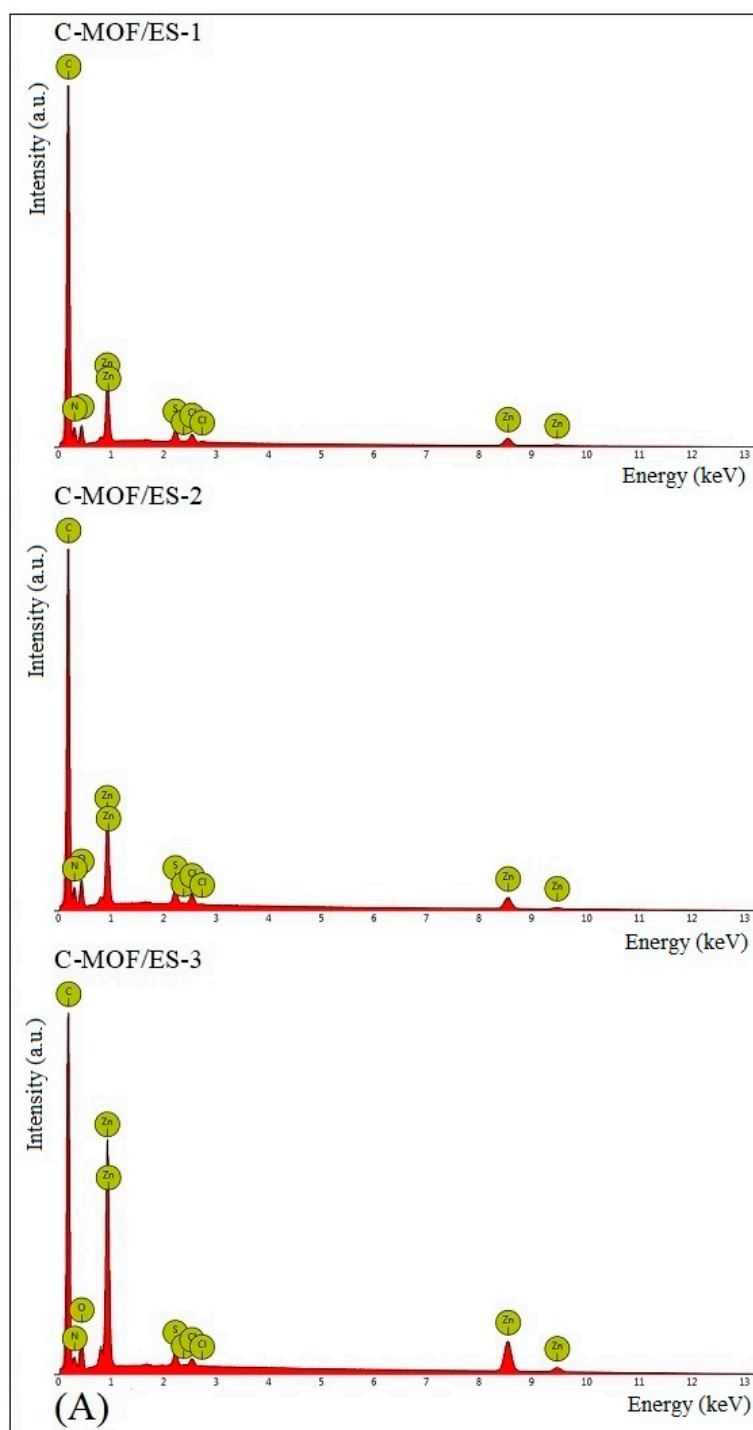

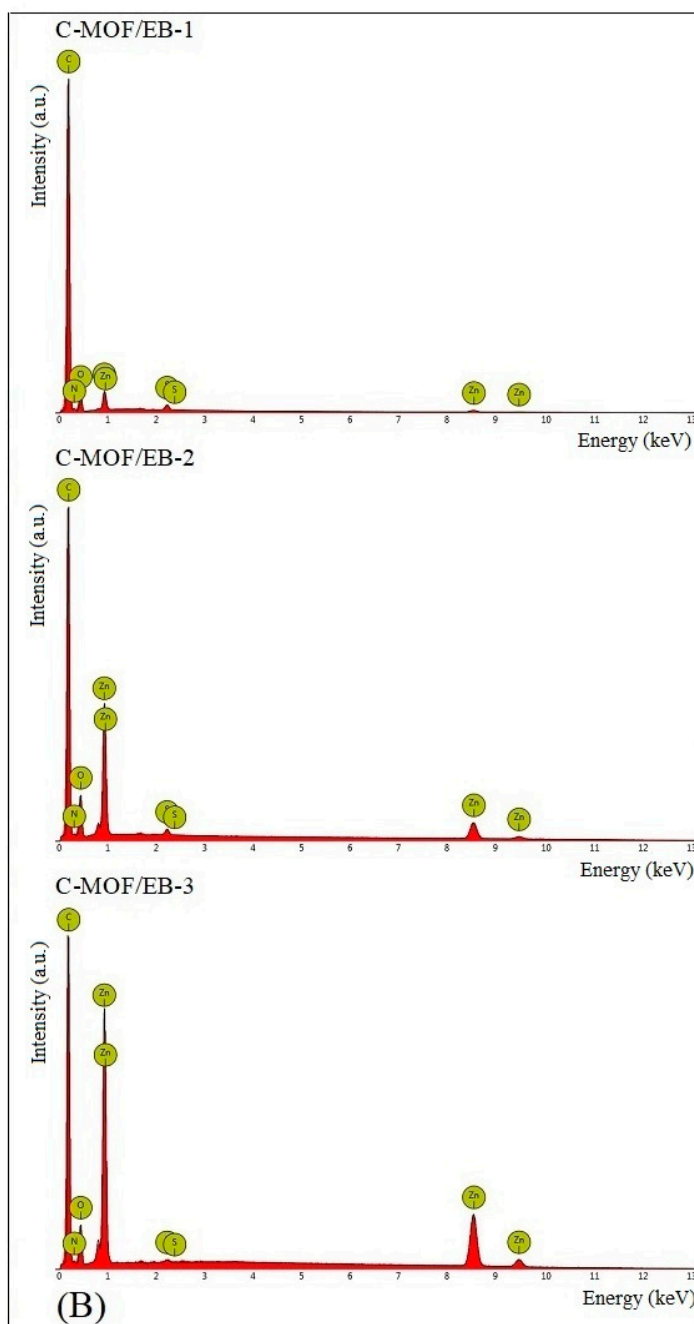

**Figure S1.** EDX spectra of C-(MOF-5/PANI) samples of (A) C-MOF/ES series and (B) C-MOF/EB series.

## S2. Confirmation of O incorporation into the carbonaceous phase of C-(MOF-5/PANI) composites

Confirmation that the part of O is incorporated into the carbonaceous phase of C-(MOF-5/PANI) composites (besides the part of O which is present within ZnO) is obtained by using data on the elemental contents of C-(MOF-5/PANI) samples shown in **Table 1** and **Table 2**, and taking into account the results of XRPD analysis which confirmed the presence of ZnO and ZnS phases in C-MOF/ES and ZnO phase in C-MOF/EB series (section 3.4). For C-MOF/EB series, we have first calculated the stoichiometric quantity (wt.%) of O bonded to Zn within ZnO, and then made the difference between the total amount of O and the amount of O in ZnO, thus obtaining the amount of O incorporated in the carbonaceous phase. For C-MOF/ES series, the presence of ZnS phase must be

additionally taken into account, so we first calculated the amount of Zn present within ZnS based on the content of S acquired by EDX analysis. The remaining amount of Zn corresponds to ZnO phase and it enabled calculation of the amount of O in ZnO phase. The rest of calculation to obtain the amount of O incorporated in the carbonaceous phase is the same as that for C-MOF/EB series. The calculated amounts of O in ZnO and carbonaceous phase, as well as the amounts of Zn present in ZnO and ZnS phases are presented in **Table S1** (calculation made from EDX data) and **Table S2** (calculation based on FAAS, elemental analysis and EDX data).

**Table S1.** Zn and O contents (total and in individual phases) of C-(MOF-5/PANI) samples calculated from EDX data.

| C-(MOF-5/PANI)<br>sample | Content (wt.%) |              |              |            |             |                      |
|--------------------------|----------------|--------------|--------------|------------|-------------|----------------------|
|                          | Zn<br>total    | Zn<br>in ZnS | Zn<br>in ZnO | O<br>total | O<br>in ZnO | O in carbon<br>phase |
| C-MOF/ES-1               | 8.85           | 1.59         | 7.26         | 7.74       | 1.78        | 5.96                 |
| C-MOF/ES-2               | 13.48          | 1.39         | 12.09        | 9.55       | 2.96        | 6.59                 |
| C-MOF/ES-3               | 27.55          | 1.12         | 26.43        | 6.60       | 6.47        | 0.13                 |
| C-MOF/EB-1               | 5.72           | /            | 5.72         | 11.68      | 1.40        | 10.28                |
| C-MOF/EB-2               | 17.73          | /            | 17.73        | 11.95      | 4.34        | 7.61                 |
| C-MOF/EB-3               | 33.03          | /            | 33.03        | 7.77       | 7.77        | /                    |

**Table S2.** Zn and O contents (total and in individual phases) of C-(MOF-5/PANI) samples, calculated from FAAS (total Zn content), elemental analysis (total O content), and EDX data (S content).

| C-(MOF-5/PANI)<br>sample | Content (wt.%) |              |              |            |             |                      |
|--------------------------|----------------|--------------|--------------|------------|-------------|----------------------|
|                          | Zn<br>total    | Zn<br>in ZnS | Zn<br>in ZnO | O<br>total | O<br>in ZnO | O in carbon<br>phase |
| C-MOF/ES-1               | 7.76           | 1.59         | 6.17         | 15.15      | 1.51        | 13.64                |
| C-MOF/ES-2               | 15.96          | 1.39         | 14.57        | 20.35      | 3.56        | 16.79                |
| C-MOF/ES-3               | 31.34          | 1.12         | 30.22        | 19.39      | 7.39        | 12.00                |
| C-MOF/EB-1               | 41.53          | /            | 41.53        | 19.17      | 10.16       | 9.01                 |
| C-MOF/EB-2               | 45.05          | /            | 45.05        | 23.75      | 11.02       | 12.73                |
| C-MOF/EB-3               | 44.90          | /            | 44.90        | 24.54      | 10.98       | 13.56                |

### S3. Phase assignation and indexing of reflections observed in XRPD patterns of C-(MOF-5/PANI) samples

**Table S3.** Phase assignation and indexing of reflections observed in XRPD patterns of C-(MOF-5/PANI) samples.<sup>a</sup>

| C-MOF/ES                   |                            |                            | C-MOF/EB                   |               |               |
|----------------------------|----------------------------|----------------------------|----------------------------|---------------|---------------|
| C-MOF/ES-1                 | C-MOF/ES-2                 | C-MOF/ES-3                 | C-MOF/EB-1                 | C-MOF/EB-2    | C-MOF/EB-3    |
| 2 $\theta$ /°              | 2 $\theta$ /°              | 2 $\theta$ /°              | 2 $\theta$ /°              | 2 $\theta$ /° | 2 $\theta$ /° |
| Carbon<br>24.4 (amorphous) | Carbon<br>25.1 (amorphous) | Carbon<br>24.2 (amorphous) | Carbon<br>24.0 (amorphous) |               |               |
| 27.0 ZnS(100)              | 27.4 ZnS(100)              | 27.0 ZnS (100)             |                            |               |               |
| 28.7 ZnS(002)              | 28.9 ZnS(002)              | 28.6 ZnS(002)              |                            |               |               |

|               |                        |                             |                |                |                |  |  |  |  |
|---------------|------------------------|-----------------------------|----------------|----------------|----------------|--|--|--|--|
| 30.3 ZnS(101) | 30.6 ZnS(101)          | 30.6 ZnS(101)               |                |                |                |  |  |  |  |
|               | 31.8 ZnO (100)         | 31.8 ZnO (100)              | 31.6 ZnO (100) | 32.0 ZnO (100) | 32.0 ZnO (100) |  |  |  |  |
|               | 34.2 ZnO (002)         | 34.5 ZnO (002)              | 34.4 ZnO (002) | 34.7 ZnO (002) | 34.6 ZnO (002) |  |  |  |  |
|               | 36.2 ZnO (101)         | 36.3 ZnO (101)              | 36.2 ZnO (101) | 36.5 ZnO (101) | 36.5 ZnO (101) |  |  |  |  |
| 47.8 ZnS(110) | ZnO (102),<br>ZnS(110) | 47.6 ZnO (102),<br>ZnS(110) | 47.4 ZnO (102) | 47.8 ZnO (102) | 47.8 ZnO (102) |  |  |  |  |
| 56.6 ZnS(112) | ZnO (110),<br>ZnS(112) | 56.6 ZnO (110),<br>ZnS(112) | 56.5 ZnO (110) | 56.8 ZnO (110) | 56.8 ZnO (110) |  |  |  |  |
|               | 62.8 ZnO (103)         | 62.9 ZnO (103)              | 62.7 ZnO (103) | 63.1 ZnO (103) | 63.0 ZnO (103) |  |  |  |  |
|               |                        | 66.4 ZnO (200)<br>ZnS(104)  | 66.3 ZnO (200) | 66.5 ZnO (200) | 66.5 ZnO (200) |  |  |  |  |
|               |                        | 68.0 ZnO (112)              | 67.8 ZnO (112) | 68.1 ZnO (112) | 68.1 ZnO (112) |  |  |  |  |
|               |                        | 69.2 ZnO (201)              | 68.9 ZnO (201) | 69.3 ZnO (201) | 69.2 ZnO (201) |  |  |  |  |
|               |                        | 72.6 ZnO (004)<br>ZnS (203) | 72.5 ZnO (004) | 72.8 ZnO (004) | 72.7 ZnO (004) |  |  |  |  |
|               |                        | 77.0 ZnO (202)<br>ZnS (211) | 76.8 ZnO (202) | 77.1 ZnO (202) | 77.1 ZnO (202) |  |  |  |  |
|               |                        | 81.5 ZnO (104)              | 81.3 ZnO (104) | 81.6 ZnO (104) | 81.5 ZnO (104) |  |  |  |  |

<sup>a</sup>Reflections originating from ZnS phase are assigned using ref. [51] and reflections from ZnO phase are assigned using ref. [49].

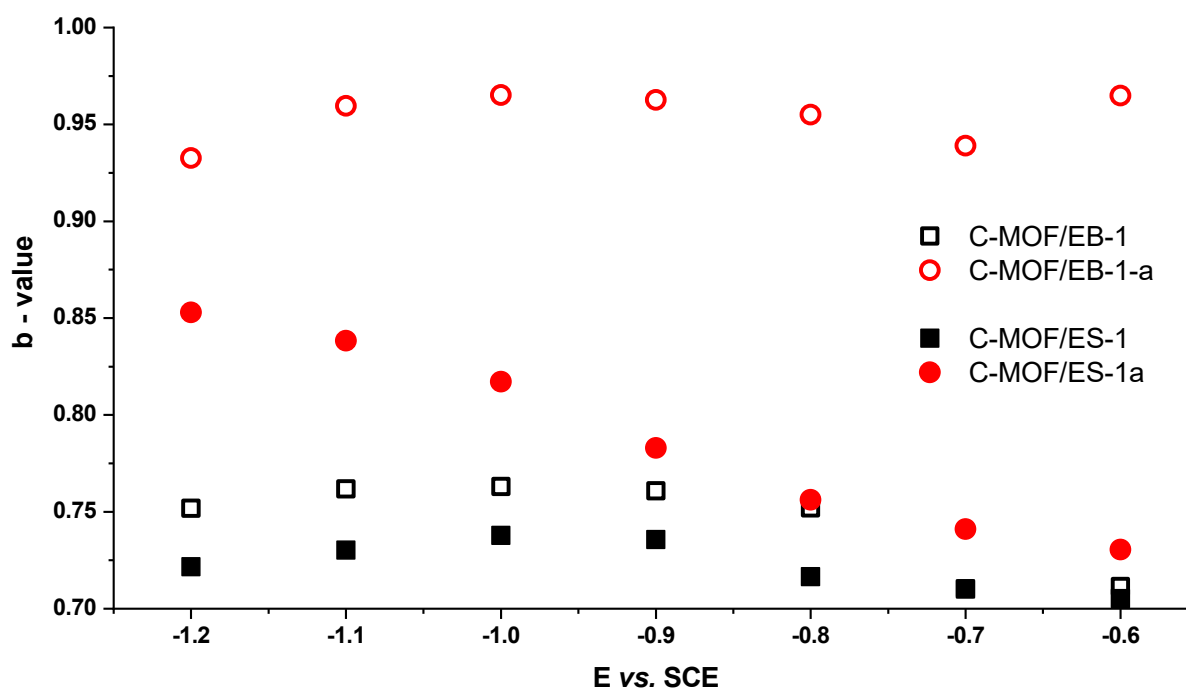

Figure S2. The *b*-values for selected samples in a wide electrode potential range.
